# Supplementary material for: Neurofibromin 1 mutations impair the function of human induced pluripotent stem cell-derived microglia
Source: PubMed Central journal article supplement (PMC10740172; doi:10.1242/dmm.049861), 2023-12-11
Supplement: dmm-16-049861-s1.pdf [file dmm-16-049861-s1.pdf]

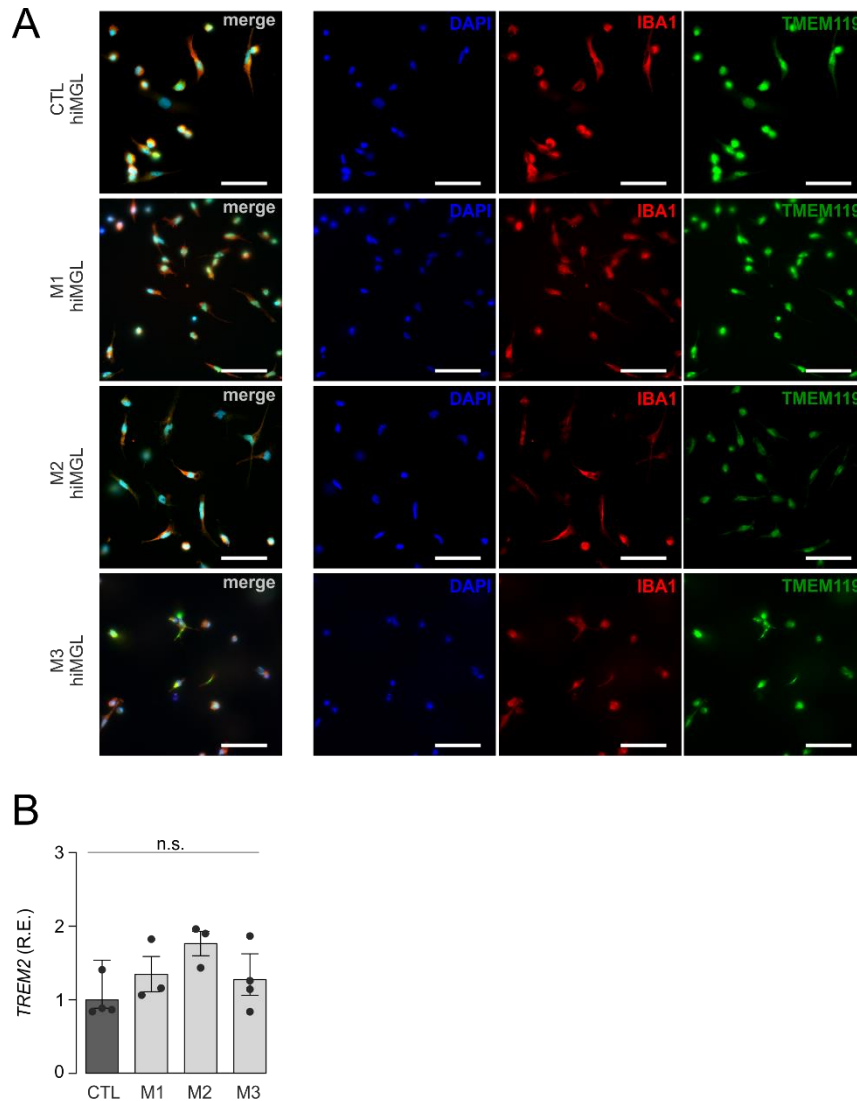

**Fig. S2. Immunohistochemical staining and TREM2 expression in CTL and *NFI*-mutant hiMGL cells**

**A** CTL and *NFI*-mutant hiMGL cells labelled with DAPI are immunopositive for IBA1 and TMEM119 expression. Merged images show the combined signal for DAPI, IBA1 and TMEM119. Scale bars, 50  $\mu$ m.

**B** Relative mRNA expression levels of the *TREM2* microglia marker were assessed in CTL and *NFI*-mutant hiMGL cells by quantitative RT-qPCR. Relative expression (R.E.) was normalized relative to the TATA box binding protein (*TBP*) housekeeping gene (n=3). Results are represented as the mean  $\pm$  SEM. Data were analyzed by one-way ANOVA followed by Tukey's multiple comparisons test.

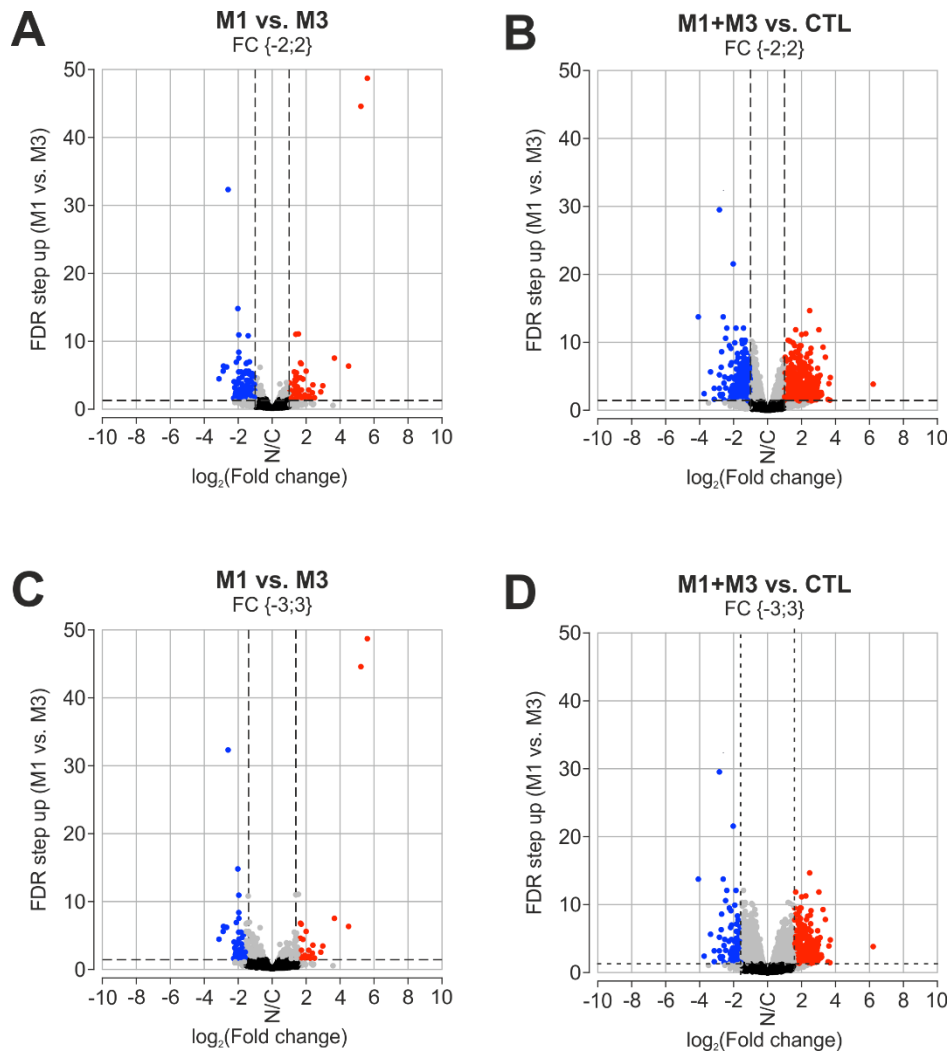

**Fig. S3. RNAseq reveals few differences between NF1-mutant and CTL hiMGL cells**

**A** Volcano plot demonstrating genes differentially expressed between M1 versus M3 [FDR < .05; fold change (-2, 2)]. Grey dots (no change), blue dots (decreased expression), red dots (increased expression)

**B** Volcano plot demonstrating genes differentially expressed between M1 and M3 versus CTL [FDR < .05; fold change (-2, 2)]. Grey dots (no change), blue dots (decreased expression), red dots (increased expression).

**C** Volcano plot demonstrating genes differentially expressed between M1 versus M3 [FDR < .05; fold change (-3, 3)]. Grey dots (no change), blue dots (decreased expression), red dots (increased expression).

**D** Volcano plot demonstrating genes differentially expressed between M1 and M3 versus CTL [FDR < .05; fold change (-3, 3)]. Grey dots (no change), blue dots (decreased expression), red dots (increased expression).

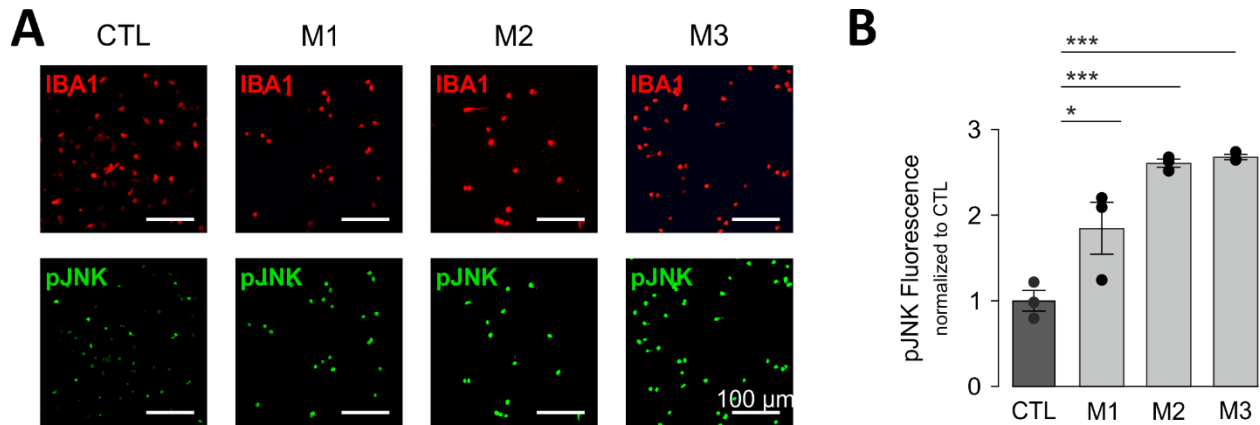

**Fig. S4. *NFI*-mutant hiMGL cells show higher p-JNK expression than CTL hiMGL cells**

**A** Immunohistochemical staining of CTL and *NFI*-mutant (M1-M3) hiMGL cells for IBA1 (red, *top*) and phosphorylated (activated) JNK (phospho-Thr<sup>183</sup>/Tyr<sup>185</sup> JNK, p-JNK; green, *bottom*). Scale bars, 100  $\mu$ m.

**B** Quantification of phospho-JNK (p-JNK) fluorescence intensity in M1, M2 and M3 hiMGL cells, normalized to CTL hiMGL cells. Data indicated by asterisks were analyzed using a one-way ANOVA followed by Tukey's multiple comparisons test. \* $P < 0.05$ ; \*\*\* $P < 0.001$ . Results are represented as the mean  $\pm$  SEM.  $N = 3$  independent differentiations for each mutant.

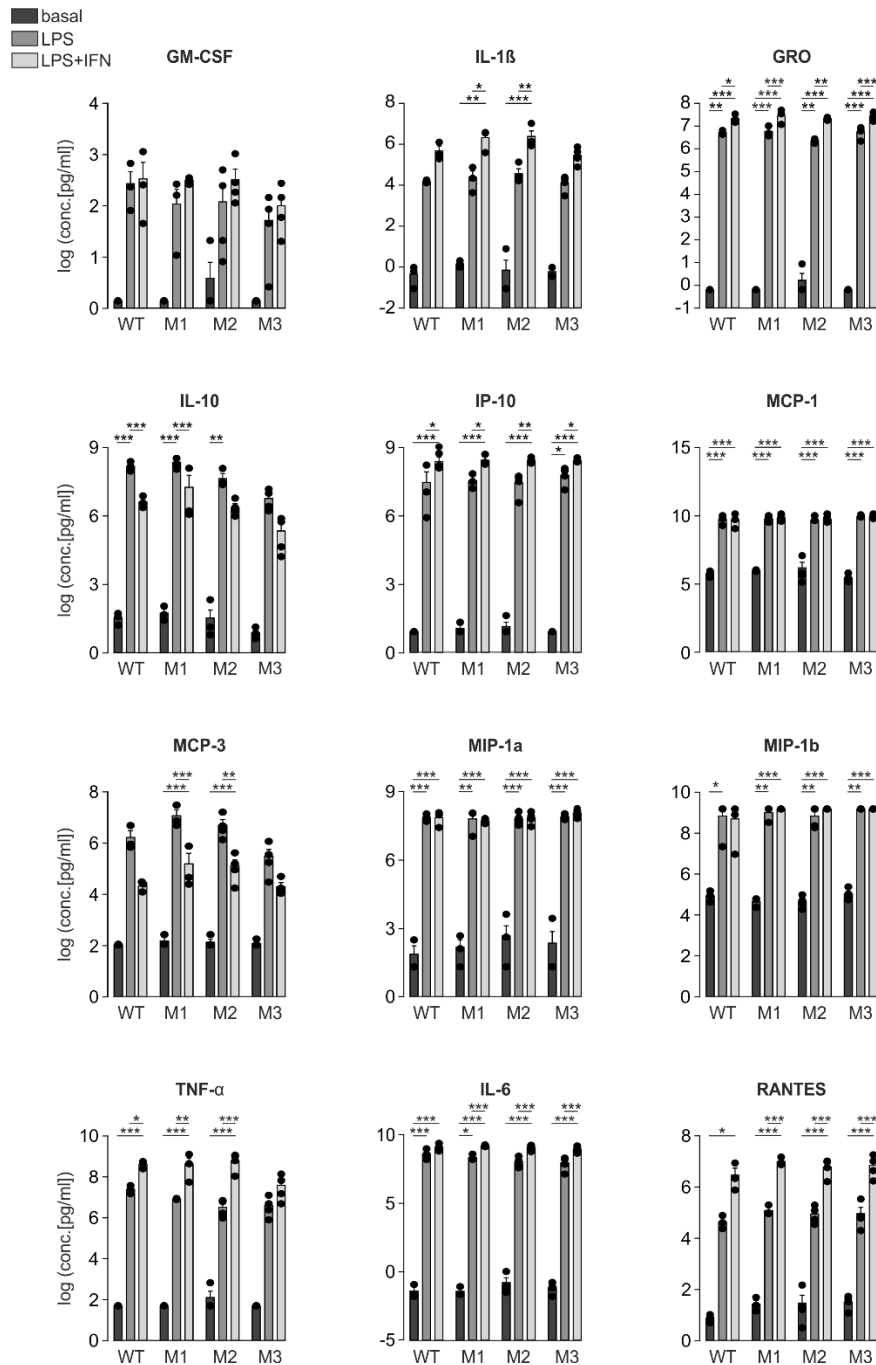

**Fig. S5. Cytokine release from CTL and *NFI*-mutant hiMGL cells**

A multiplex immunoassay was used to detect cytokines/chemokines secreted into the tissue culture medium by CTL and *NFI*-mutant hiMGL cells in response to stimulation with 1  $\mu$ g/ml LPS or 1  $\mu$ g/ml LPS + 100 ng/ml IFN- $\gamma$  for 24h (n = 3-4). Data were analyzed by an ANOVA test. \*P<0.05; \*\*P< 0.01, \*\*\*P<0.001. Results are represented as the mean  $\pm$  SEM.

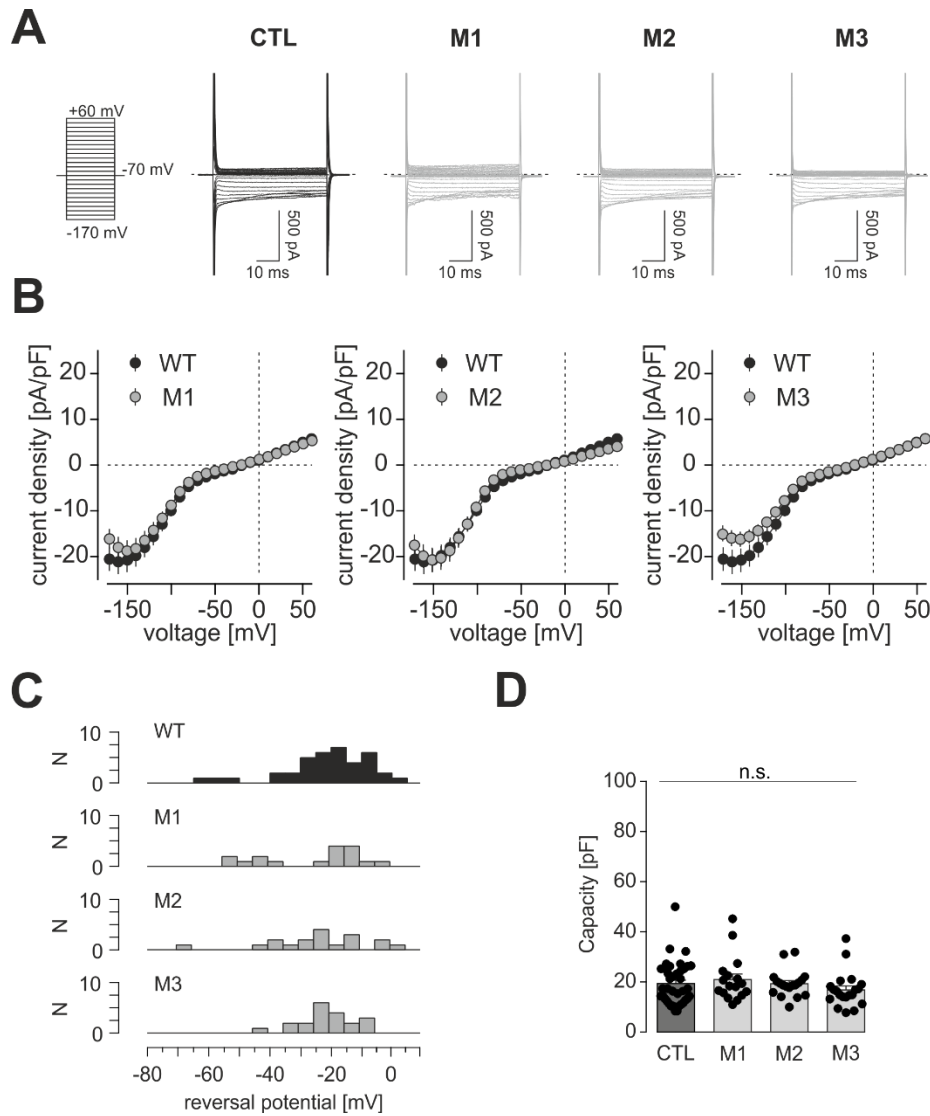

**Fig. S6. Basal membrane properties of CTL and *NF1*-mutant hiMGL cells**

**A** Sample patch clamp recordings of CTL and *NF1*-mutant hiMGL cells. Membrane currents were obtained during a series of voltage steps for 50 ms ranging from -170 mV to +60 mV from a holding potential of -70 mV.

**B** Average current density-voltage relationships of hiMGL cells obtained from the recordings shown in **A**.

**C** Distribution of the reversal potentials (indicative of the membrane potentials). N: number of patched cells.

**D**: Summary of the membrane capacities of CTL and *NF1*-mutant hiMGL cells.

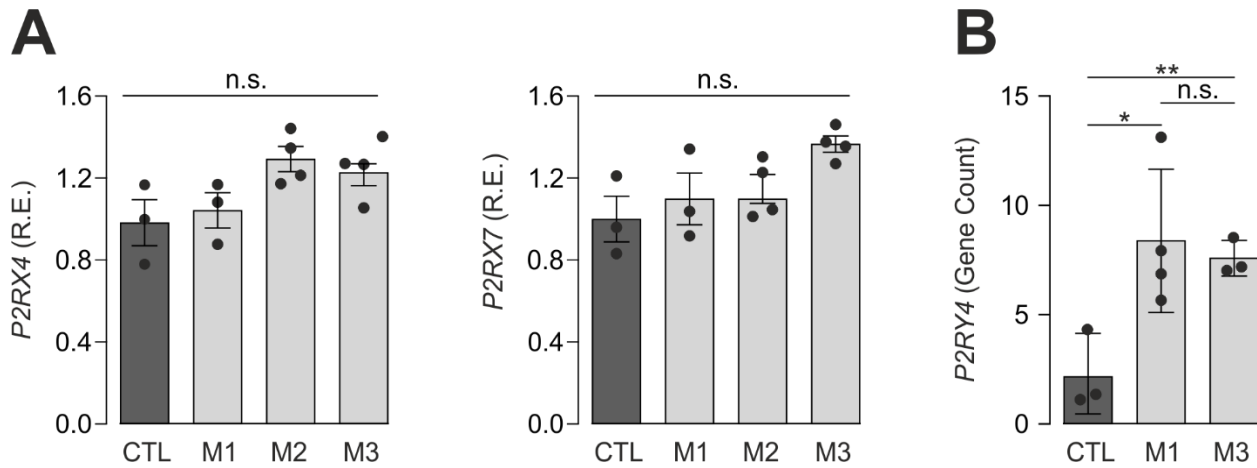

**Fig. S7. Expression of P2RX4 and P2RX7 in CTL and *NF1*-mutant hiMGL cells**

**A:** Relative *P2RX4* (left) and *P2RX7* mRNA expression (right) levels in CTL and *NF1*-mutant hiMGL cells by quantitative RT-PCR. TATA box binding protein (*TBP*) was used as a housekeeping gene for normalization ( $n = 3$ ). Data were then normalized to mRNA expression levels in CTL hiMGL cells. Results are represented as the mean  $\pm$  SD. Data were analyzed by one-way ANOVA.

**B:** P2 receptor expression from the RNA sequencing data revealed that only *P2RY4* expression was different in *NF1*-mutant hiMGL cells relative to CTL hiMGL cells. P values are included in the graph. All other genes were not statistically different between *NF1*-mutant and CTL hiMGL cell groups.

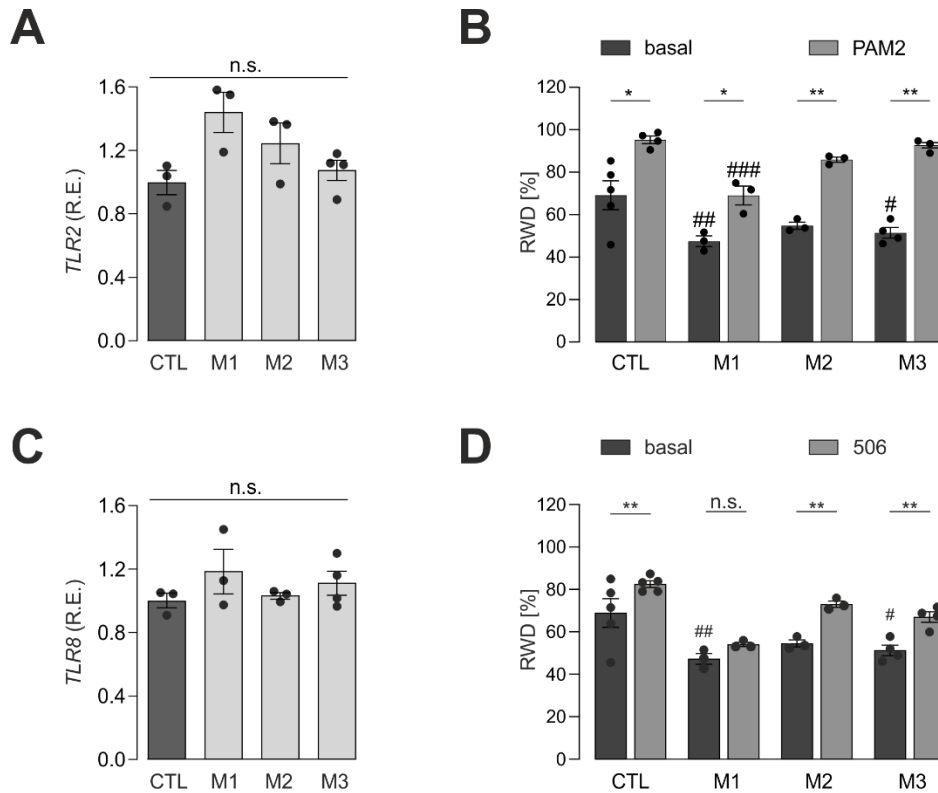

**Fig. S8. Motility of CTL and *NF1*-mutant hiMGL cells**

**A** Relative mRNA expression levels of Toll-like receptor 2 (*TLR2*) in CTL and *NF1*-mutant hiMGL cells by quantitative RT-PCR. Relative expression (R.E.) is shown relative to CTL hiMGL cells. TATA box binding protein (*TBP*) mRNA expression was used as a housekeeping gene for normalization (n = 3). Data were then normalized to *TLR2* expression of CTL hiMGL cells. Results are represented as the mean  $\pm$  SEM. Data were analyzed by one-way ANOVA.

**B** Motility was assessed using a standardized wound scratch assay (RWD) using an Incucyte Zoom System. hiMGL cells were incubated with or without Pam2CSK4 (100 ng/ml). Relative Wound Density (RWD) was assessed over the course of two days comparing CTL and *NF1*-mutant hiMGL cells. Results are represented as the mean  $\pm$  SEM. N = 5 for CTL and N = 3-4 for *NF1*-mutant hiMGL cells. Data indicated by the asterisks were analyzed by one-way ANOVA followed by Tukey's multiple comparisons test. \*P<0.05; \*\*P< 0.01, \*\*\*P<0.001. Comparisons between basal and Pam2CSK4 conditions were performed using a Student's t-test: #P<0.05, ###P<0.001.



**C** Relative mRNA expression levels of Toll-like receptor 8 (*TLR8*) was assessed in CTL and *NF1*-mutant hiMGL cells by quantitative RT-PCR. TATA box binding protein (*TBP*) was used as a housekeeping gene for normalization (n=3). Data were then normalized to *TLR8* expression of CTL hiMGL cells. Results are represented as the mean  $\pm$  SD. Data were analyzed by one-way ANOVA.

**D** RWD after 36h was represented as the mean  $\pm$  SEM. N = 5 for CTL and N = 3 for *NF1*-mutant hiMGL cells. hiMGL cells were incubated with or without 506 (100 ng/ml). Data indicated by the asterisks were analyzed by one-way ANOVA followed by Tukey's multiple comparisons test. \*P<0.05; \*\*P< 0.01, \*\*\*P<0.001. Comparisons between basal and 506 conditions were performed using a Student's t-test: ##P<0.01.

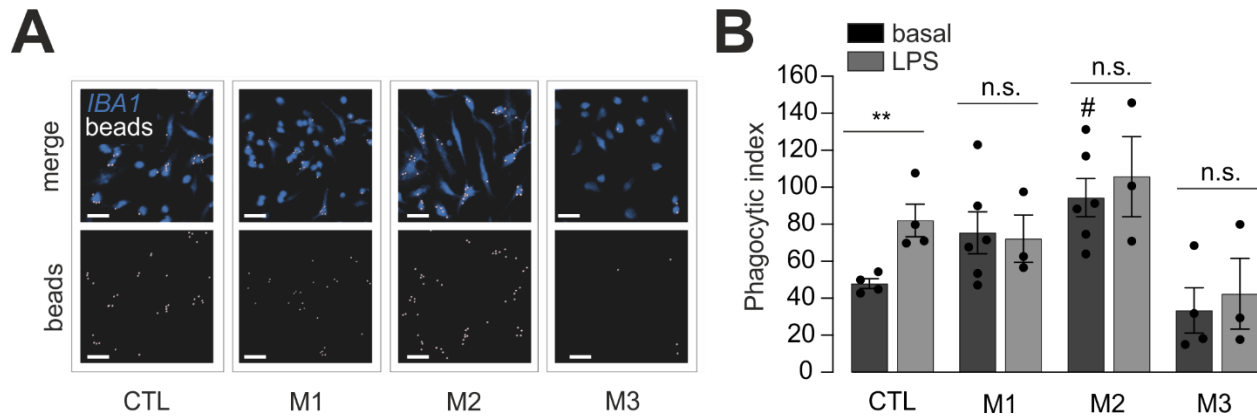

**Fig. S9. Phagocytic activity of CTL and *NFI*-mutant hiMGL cells**

Phagocytic activity was assessed by microscopy using fluorescent microbeads. CTL and *NFI*-mutant hiMGL cells were incubated for 1h with beads with or without addition of 1  $\mu\text{g/ml}$  LPS.

**A:** Representative images of CTL and *NFI*-mutant hiMGL cells at the end of the assay period under LPS stimulation conditions. IBA1 staining is indicated in blue and beads in white. Scale bars, 20  $\mu\text{m}$ .

**B:** Phagocytic activity presented as the phagocytic index, which is a measure of the percentage of cells harboring 0, 1, 2 or >3 engulfed beads. Data indicated by asterisks were analyzed by one-way ANOVA followed by Tukey's multiple comparisons test. \* $P < 0.05$ ; \*\* $P < 0.01$ , \*\*\* $P < 0.001$ . Comparisons between basal and UDP conditions were performed using a Student's t-test: #### $P < 0.001$ . Results are represented as the mean  $\pm$  SEM.  $N = 5$  for CTL and  $n = 3$  for *NFI*-mutant hiMGL cells.

**Table S1. Antibodies used**

| Antibody                             | Company                  | Host species | Dilution | Catalog number |
|--------------------------------------|--------------------------|--------------|----------|----------------|
| Anti-IBA1                            | Abcam                    | Goat         | 1:250    | ab5076         |
| Anti-NANOG                           | Thermo Fisher Scientific | Rabbit       | 1:100    | PA1-097        |
| Anti Phospho-JNK (phospho-T183/Y185) | R&D Systems              | Rabbit       | 1:100    | MAB1205        |
| Anti-OCT-3/4                         | Santa Cruz               | Rabbit       | 1:100    | sc-9081        |
| Anti-P2RY12                          | Genetex                  | Rabbit       | 1:200    | GTX54796       |
| Anti-SSEA-4                          | Abcam                    | Mouse        | 1:100    | ab16287        |
| Anti-TMEM119                         | Abcam                    | Rabbit       | 1:200    | ab185333       |
| Anti-TRA-1-60                        | Abcam                    | Mouse        | 1:100    | ab16288        |
|                                      |                          |              |          |                |
| Anti-Goat-AF488                      | Dianova                  | Donkey       | 1:200    | 705-545-147    |
| Anti-mouse-AF647                     | Dianova                  | Donkey       | 1:125    | 715-605-151    |
| Anti-rabbit-AF647                    | Dianova                  | Donkey       | 1:200    | 711-605-152    |
| Anti-Goat-AF647                      | Dianova                  | Donkey       | 1:200    | 705-605-147    |

**Table S2. Primers used**

| <b>Primer</b>  |         | <b>Sequence</b>                 |
|----------------|---------|---------------------------------|
| <i>AIF1</i>    | forward | 5'- TTGGTGAGAAACGGGTGATTTG-3'   |
|                | reverse | 5'- ATGGAGCATGTAGGAGAGACC-3'    |
| <i>P2RX4</i>   | forward | 5'- GAGATTCCAGATGCGACCACT-3'    |
|                | reverse | 5'- ACCCGTTGAAAGCTACGCAC-3'     |
| <i>P2RX7</i>   | forward | 5'- TATGAGACGAACAAAGTCACTCG-3'  |
|                | reverse | 5'- GCAAAGCAAACGTAGGAAAAGAT-3'  |
| <i>P2RY6</i>   | forward | 5'- GTGTCTACCGCGAGAACTTCA-3'    |
|                | reverse | 5'- CCAGAGCAAGGTTTAGGGTGTA-3'   |
| <i>P2RY12</i>  | forward | 5'- CACTGCTCTACACTGTCCTGT-3'    |
|                | reverse | 5'- AGTGGTCCTGTTCCCAGTTTG-3'    |
| <i>TBP1</i>    | forward | 5'- AGCGCAAGGGTTTCTGGTTT-3'     |
|                | reverse | 5'- CTGAATAGGCTGTGGGGTCA-3'     |
| <i>TLR2</i>    | forward | 5'- TTATCCAGCACACGAATACACAG-3'  |
|                | reverse | 5'- AGGCATCTGGTAGAGTCATCAA-3'   |
| <i>TLR4</i>    | forward | 5'- TGGAAGTTGAACGAATGGAATGTG-3' |
|                | reverse | 5'- ACCAGAACTGCTACAACAGATACT-3' |
| <i>TLR8</i>    | forward | 5'- CCACCTTGAAGAGAGCCGAG-3'     |
|                | reverse | 5'- TGCTCTGCATGAGGTTGTCG-3'     |
| <i>TMEM119</i> | forward | 5'- GAGGAGGGACGGGAGGAG-3'       |
|                | reverse | 5'- CAGAAGGATGAGGAGGCTGG-3'     |

**Table S3. Differentially expressed genes between M1 & M3 relative to CTL hiMGL cells**

| Gene name         | P-value  | FDR      | Fold change (M1 & M3 vs. CTL) |
|-------------------|----------|----------|-------------------------------|
| <i>DCANP1</i>     | 6.18E-06 | 1.82E-04 | 71.76                         |
| <i>GPR22</i>      | 2.13E-05 | 4.53E-04 | 15.36                         |
| <i>FOXN3-AS2</i>  | 3.54E-10 | 1.07E-07 | 12.56                         |
| <i>EHF</i>        | 7.92E-05 | 1.18E-03 | 9.39                          |
| <i>SAA1</i>       | 7.42E-04 | 6.31E-03 | 9.31                          |
| <i>YY1P1</i>      | 5.45E-12 | 3.98E-09 | 9.00                          |
| <i>RNF43</i>      | 3.96E-03 | 2.18E-02 | 8.81                          |
| <i>KCNAB1</i>     | 2.76E-06 | 1.00E-04 | 7.57                          |
| <i>ZNF22-AS1</i>  | 2.83E-05 | 5.54E-04 | 7.44                          |
| <i>CDH1</i>       | 8.37E-04 | 6.93E-03 | 7.18                          |
| <i>DSP</i>        | 7.36E-05 | 1.12E-03 | 7.01                          |
| <i>FAM83B</i>     | 1.49E-03 | 1.06E-02 | 6.99                          |
| <i>TAS2R30</i>    | 5.23E-05 | 8.71E-04 | 6.65                          |
| <i>OR7E38P</i>    | 7.98E-06 | 2.17E-04 | 6.56                          |
| <i>GAS8</i>       | 6.93E-03 | 3.28E-02 | 6.54                          |
| <i>KLB</i>        | 2.36E-03 | 1.47E-02 | 6.36                          |
| <i>OGN</i>        | 1.29E-07 | 1.00E-05 | 6.32                          |
| <i>EIF1P7</i>     | 7.56E-03 | 3.51E-02 | 6.11                          |
| <i>PLGLB2</i>     | 6.39E-07 | 3.33E-05 | 6.02                          |
| <i>LBH</i>        | 1.08E-03 | 8.39E-03 | 5.95                          |
| <i>PLN</i>        | 2.00E-05 | 4.35E-04 | 5.94                          |
| <i>LAMP3</i>      | 9.26E-04 | 7.43E-03 | 5.90                          |
| <i>PRMT5-AS1</i>  | 7.23E-04 | 6.20E-03 | 5.76                          |
| <i>SRGAP2-AS1</i> | 1.77E-05 | 3.99E-04 | 5.70                          |
| <i>GNPDA2</i>     | 3.21E-07 | 1.97E-05 | 5.45                          |
| <i>PIGAP1</i>     | 1.63E-06 | 6.66E-05 | 5.23                          |
| <i>TAS2R13</i>    | 4.79E-05 | 8.22E-04 | 5.22                          |
| <i>DIAPH1-AS1</i> | 4.10E-09 | 7.42E-07 | 5.21                          |
| <i>HSBP1L1</i>    | 7.00E-03 | 3.30E-02 | 5.18                          |
| <i>CCL22</i>      | 7.69E-05 | 1.16E-03 | 5.18                          |
| <i>CTXND1</i>     | 8.63E-03 | 3.87E-02 | 5.16                          |
| <i>CD1A</i>       | 1.19E-08 | 1.68E-06 | 5.16                          |
| <i>ATP5PDP4</i>   | 2.24E-06 | 8.42E-05 | 5.13                          |
| <i>TAS2R31</i>    | 5.12E-04 | 4.81E-03 | 5.12                          |
| <i>OR10A2</i>     | 6.28E-04 | 5.59E-03 | 5.09                          |
| <i>MANEA-DT</i>   | 5.40E-03 | 2.72E-02 | 5.08                          |
| <i>HSPD1P11</i>   | 1.56E-03 | 1.09E-02 | 5.02                          |
| <i>TMEM178A</i>   | 1.61E-03 | 1.12E-02 | -5.20                         |
| <i>SAP25</i>      | 2.52E-18 | 9.56E-15 | -5.28                         |
| <i>DNAH8</i>      | 3.41E-04 | 3.57E-03 | -5.39                         |
| <i>PDCD6-AHRR</i> | 1.73E-14 | 4.11E-11 | -5.80                         |

|                     |          |          |        |
|---------------------|----------|----------|--------|
| <i>TNFSF9</i>       | 3.42E-06 | 1.18E-04 | -5.94  |
| <i>SYNPO2L-ASI</i>  | 6.61E-08 | 6.03E-06 | -5.94  |
| <i>CAT</i>          | 1.70E-20 | 1.08E-16 | -6.39  |
| <i>DNAAF4-CCPG1</i> | 6.59E-06 | 1.90E-04 | -6.39  |
| <i>GOPC</i>         | 7.45E-27 | 1.21E-22 | -6.90  |
| <i>MUSTN1</i>       | 5.03E-04 | 4.77E-03 | -7.80  |
| <i>CEMP1</i>        | 7.07E-07 | 3.59E-05 | -8.05  |
| <i>SDHAP2</i>       | 6.63E-13 | 7.51E-10 | -15.60 |

**Table S4. Differentially expressed genes between M1 vs. M3 hiMGL cells**

| <b>Gene name</b>    | <b>P-value</b> | <b>FDR</b> | <b>Fold change (M1 vs. M3)</b> |
|---------------------|----------------|------------|--------------------------------|
| <i>GOPC</i>         | 7.08E-40       | 1.35E-35   | 46.33                          |
| <i>ZNF252P</i>      | 2.21E-33       | 2.10E-29   | 30.69                          |
| <i>DNAAF4-CCPG1</i> | 6.18E-05       | 1.07E-02   | 10.40                          |
| <i>MIR124-1HG</i>   | 2.11E-04       | 2.39E-02   | 5.18                           |
| <i>PCDHA10</i>      | 3.09E-04       | 3.14E-02   | 5.04                           |
| <i>BIRC3</i>        | 2.29E-04       | 2.50E-02   | -5.08                          |
| <i>LTBP1</i>        | 2.67E-08       | 2.21E-05   | -5.96                          |
| <i>PCDHGA10</i>     | 1.66E-28       | 1.05E-24   | -6.03                          |
| <i>PRSS8</i>        | 2.14E-09       | 2.55E-06   | -6.69                          |
| <i>TSSC2</i>        | 4.48E-05       | 8.60E-03   | -9.57                          |
| <i>EHF</i>          | 3.19E-11       | 5.05E-08   | -11.10                         |

**Table S5. Materials for cell culture and *in vitro* experiments**

| Product name                                            | Company                  | Catalog number |
|---------------------------------------------------------|--------------------------|----------------|
| $\alpha$ -Thioglycerol                                  | Merck                    | M1753-100ML    |
| 24-well plates                                          | Sarstedt                 | 83.3922        |
| 4',6-diamidino-2-phenylindole (DAPI)                    | Merck                    | 32670          |
| Aqua-Poly/Mount                                         | Polysciences Europe GmbH | 18606          |
| B-27 Supplement (50X), serum free                       | Life Technologies        | 17504-044      |
| Bambanker                                               | GC Lymphotec             | 302-14681      |
| CD200, Human 50 $\mu$ g                                 | Novoprotein              | C311           |
| CX3CL1, 5 $\mu$ g                                       | Peptotech                | 300-31         |
| Cyclic CAMP ELISA Kit                                   | Cayman Chemical          | 581001         |
| DMEM/F-12, HEPES, no phenol red                         | Life Technologies        | 11039-021      |
| Donkey serum                                            | Merck                    | S30            |
| Falcon® 6-well Clear Flat Bottom Plates                 | Corning                  | 353046         |
| Fetal Calf Serum (FCS)                                  | Life Technologies        | 10270-106      |
| Fluoresbrite® YG Carboxylate Microspheres, 3.00 $\mu$ m | Polysciences Europe GmbH | 17147-5        |
| Geltrex™                                                | Life Technologies        | A14133-02      |
| GlutaMAX Supplement-100 mL                              | Life Technologies        | 35050-038      |
| HBSS                                                    | Life Technologies        | 14175-129      |
| Human Insulin                                           | PromoCell                | C-52310        |
| IL-34 2 $\mu$ g                                         | Peptotech                | 200-34         |
| Incucyte® Imagelock 96-well plates                      | Sartorius                | BA-04856       |
| Insulin-Transferrin-Selenite                            | Life Technologies        | 41400-045      |
| Lipopolysaccharide from <i>E.coli</i>                   | Merck                    | L43191         |
| M-CSF                                                   | Peptotech                | 300-25         |
| MEM Non-Essential Amino Acids Solution (100X)-100 mL    | Life Technologies        | 11140-035      |
| TLR2 Agonist Pam2CSK4                                   | R&D Systems              | 4637/1         |
| P2RX4 Inhibitor 5-BDBD                                  | R&D Systems              | 3579/10        |
| P2RX7 Inhibitor A 740003                                | Tocris                   | 3701           |
| P2RY12 Inhibitor ARC-69931 Tetrasodium salt             | Tocris, Bio-Techne GmbH  | 5720/1         |
| N-2 Supplement (100X)                                   | Life Technologies        | 17502-048      |
| PBS                                                     | Life Technologies        | 14190-169      |
| ReliaPrep™ RNA Tissue Kit                               | Promega                  | Z6112          |
| STEMdiff™ Hematopoietic Kit                             | Stemcell Technologies    | 5310           |
| StemMACS™ iPS-Brew XF                                   | Miltenyi Biotec          | 130-107-086    |
| StemPro® Accutase®                                      | Life Technologies        | A11105-01      |
| SYBR Green Master Mix                                   | Life Technologies        | 4472918        |
| TGF $\beta$ 1                                           | Peptotech                | 100-21C        |
| TL8-506                                                 | InvivoGen                | Tlrl-Tl8506    |
| Thiazovivin                                             | StemCell Technologies™   | 72252          |
| Triton® X-100                                           | Roth                     | 3051.3         |
